# Supplementary material
Source: PubMed Central journal article supplement (PMC3190882)

Supplementary Figure 1

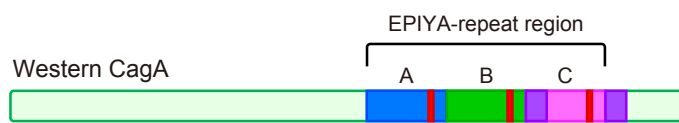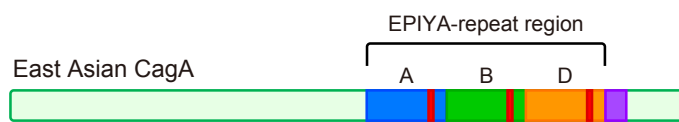

■ : CagA-multimerization (CM) sequence

■ : EPIYA motif

Supplement: supp_M111.258673_jbc.M111.258673-1.pdf [file supp_M111.258673_jbc.M111.258673-1.pdf]
